# Supplementary material for: S defect-rich MoS2: differences of S point defects and S stripping defects in photocatalysis
Source: Royal Society of Chemistry journal article supplement (doi:10.1039/d4qm00604f), 2024-01-01
Supplement: d4qm00604f2.pdf [file d4qm00604f2.pdf]

# **S Defect-rich MoS<sub>2</sub>: Differences of S Point-defects and S Stripping-defects in Photocatalysis**

Jiafei Ren,<sup>‡a</sup> Jiqi Xing,<sup>‡a</sup> Jian Sun,<sup>a</sup> Haobo Ma,<sup>a</sup> Jiamin You<sup>a</sup> and Juan Liu<sup>\*a</sup>

## **Support Information**

### **Table of Contents**

#### **S1. Experimental Details**

#### **S2. Simulation Details**

#### **S3. Supplementary Figures**

#### **S4. Supplementary Tables**

#### **Supplementary References**

## S1. Experimental Details

### Materials

Sodium molybdate dihydrate ( $\text{Na}_2\text{MoO}_4 \cdot 2\text{H}_2\text{O}$ , 99 %), thiourea ( $\text{CH}_4\text{N}_2\text{S}$ , 99 %), Tert-Butyl alcohol (TBA), p-benzoquinone (PBQ), and methylene blue (MB) were purchased from Shanghai Macklin Biochemical Co., Ltd. Potassium hydrogen phthalate ( $\text{C}_8\text{H}_5\text{KO}_4$ ) was purchased from Sinopharm Chemical Reagent Co., Ltd. Hydrogen peroxide (30 wt %) was purchased from Shenyang Paier Fine Chemicals. Lithium iodide (LiI, 99 %), potassium iodide (KI,  $\geq 99$  %), ethanol (EA  $\geq 99$  %), and methanol ( $\geq 99$  %) were acquired from Shanghai Aladdin Biotechnology Co., Ltd. All of these reagents are of analytical grade and can be used directly. The deionized water was self-produced in the laboratory.

### Preparation of samples

First, 15 mmol of  $\text{CH}_4\text{N}_2\text{S}$  and different amounts of LiI (2 mmol, 4 mmol, 6 mmol, and 8 mmol) were dissolved in 15 mL of deionized water, stirred for 20 minutes, and then 7 mmol of  $\text{Na}_2\text{MoO}_4 \cdot 2\text{H}_2\text{O}$  was added and stirred for 10 minutes. After stirring evenly, the solution was transferred to a 50 mL polytetrafluoroethylene reaction kettle, sealed, placed in an oven, and reacted at 200 °C for 24 hours. After natural cooling to room temperature, the obtained black precipitate was collected by centrifugation, washed three times with deionized water and anhydrous ethanol, and dried at 60 °C for 12 hours. The resulting catalyst was named NMSL-X, where X represents the amount of lithium iodide added.

The pristine  $\text{MoS}_2$  was named P-NMS. 15mmol of  $\text{CH}_4\text{N}_2\text{S}$  and 7 mmol  $\text{Na}_2\text{MoO}_4 \cdot 2\text{H}_2\text{O}$  were dissolved in 15mL deionized water, stirred for 30min and then hydrothermal reaction was performed to obtain P-NMS.

### Characterization

The structure of the sample was analyzed by X-ray diffractometer (XRD, D/MAX-Ultmer+) equipped with Cu  $K\alpha$  radiation. The UV-Vis absorption spectrum of the sample is determined by UV-Vis spectrophotometer (UV-2700i, SHIMADZU). The morphology and elemental distribution of the samples were analyzed using a scanning electron microscope (SEM, SUPER55/SAPPHIRE) equipped with an energy dispersive spectrometer (EDS). The microstructure of the sample was observed by transmission electron microscopy (TEM, JEM-2100). Analyzing the chemical composition and defect

content of the sample surface using Thermo Scientific K-Alpha photoelectron spectroscopy (XPS). The specific surface area (BET) was measured using a Quantachrome 3.01 specific surface and porosity analyzer. Electron paramagnetic resonance (EPR) spectra were obtained on a Bruker EMX PLUS.

### Photocatalytic experiments

Add 30 mg of catalyst to 80 mL of MB solution with a concentration of 10 mg/L, and sonicate for 5 minutes to achieve uniform dispersion. Then, stir for 1 hour in dark to reach adsorption equilibrium. In the subsequent photocatalytic degradation, use a Xenon lamp with a power of 85 mW cm<sup>-2</sup> equipped as the light source. During 120 min photocatalytic reaction, collect 3 mL MB solution every 30 minutes, and the supernatant is retained after centrifugation at 11000 rpm. The MB content is determined by measuring the light absorbance intensity of the supernatant at 665 nm. According to Lamber-Beer law, removal rate  $\eta$  can be calculated by equation (1). The reaction kinetics of MB degradation is quantitatively characterized by using equation (2).

$$\eta = (1 - C_t/C_0) \cdot 100\% = (1 - A_t/A_0) \cdot 100\% \quad (1)$$

$$\ln(C_0/C_t) = kt \quad (2)$$

### Determination of active species

In the active species capture experiment, methanol, Tert-Butyl alcohol (TBA), and p-benzoquinone (PBQ) were used as holes ( $h^+$ ), hydroxyl radicals ( $\bullet OH$ ), and superoxide radicals ( $\bullet O_2^-$ ) capture agents, respectively. The capture experiments were carried out with 0.5 mL 0.5 mM capture agents in the photocatalytic degradation reaction system containing 30 mg of catalyst, 80 mL 10 mg/L of MB under light irradiation. The MB concentration was also evaluated as described in Section 1.4.

### Electrochemical measurement

Electrochemical measurements were performed in a three electrode system. The test uses Pt wire as the counter electrode, Saturated Calomel Electrode (SCE) as the reference electrode, and a Glassy Carbon Electrode (GCE) coated with a catalyst as the working electrode. The electrolyte used was 0.1 M KCl solution. The EIS in the frequency range of 100 kHz to 0.1 Hz was tested on the ParStat 3000 electrochemical workstation. The transient photocurrent response tests were conducted on the CHI-

660E electrochemical workstation. The power of the light source is  $85 \text{ mW cm}^{-2}$ , and the illumination interval is 10 s. Testing the MS at a frequency of 1 kHz.

### **Analysis of photogenerated $\text{H}_2\text{O}_2$**

The photogeneration of  $\text{H}_2\text{O}_2$  was detected using a ring-disk electrode (RRDE). Pumping high-purity nitrogen into the deionized water solution for 15 minutes before testing to ensure that the electrolyte is in a nitrogen-saturated state. The disk potential was set at open circuit voltage, and the ring potential was set at 0.9 V vs. SCE. The test is conducted at rotating speed of 1600 rpm and a scan rate of  $10 \text{ mV s}^{-1}$ .

The concentration of  $\text{H}_2\text{O}_2$  produced was determined using iodometry. Disperse 30 mg of sample in 80 mL of aqueous solution and sonicate for 5 minutes. After 120 minutes of illumination, 1 mL  $0.1 \text{ mol L}^{-1}$   $\text{C}_8\text{H}_5\text{KO}_4$  aqueous solution and 1 mL  $0.4 \text{ mol L}^{-1}$  potassium iodide (KI) aqueous solution were added to 1 mL of centrifuged supernatant. The amount of  $\text{H}_2\text{O}_2$  is determined by the absorbance of triiodide anions ( $\text{I}_3^-$ ) at 350 nm according to equation (3)

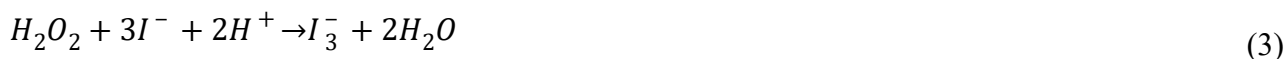

## **S2. Simulation Details**

The details of the establishment of the water box are described. First, a water cube ( $31.122 \times 31.122 \times 30.885 \text{ \AA}^3$ ) containing 1,000 water molecules is constructed according to the density ( $1 \text{ g/cm}^3$ ) under 101.3 MPa at 298 K. Then it undergoes a relaxation process of 1 ns. The equilibrium water cube were placed on the  $\text{MoS}_2$  surface ( $25.283 \times 65.688 \text{ \AA}^2$ ). The lattice parameter of  $\text{MoS}_2$  models of different S-defect surfaces is  $54.590 \text{ \AA}$ . 1313 water molecules out of the lattice were removed. The establishment of this system model and the above-mentioned relaxation process are all carried out in the Materials Studio.

### S3. Supplementary Figures

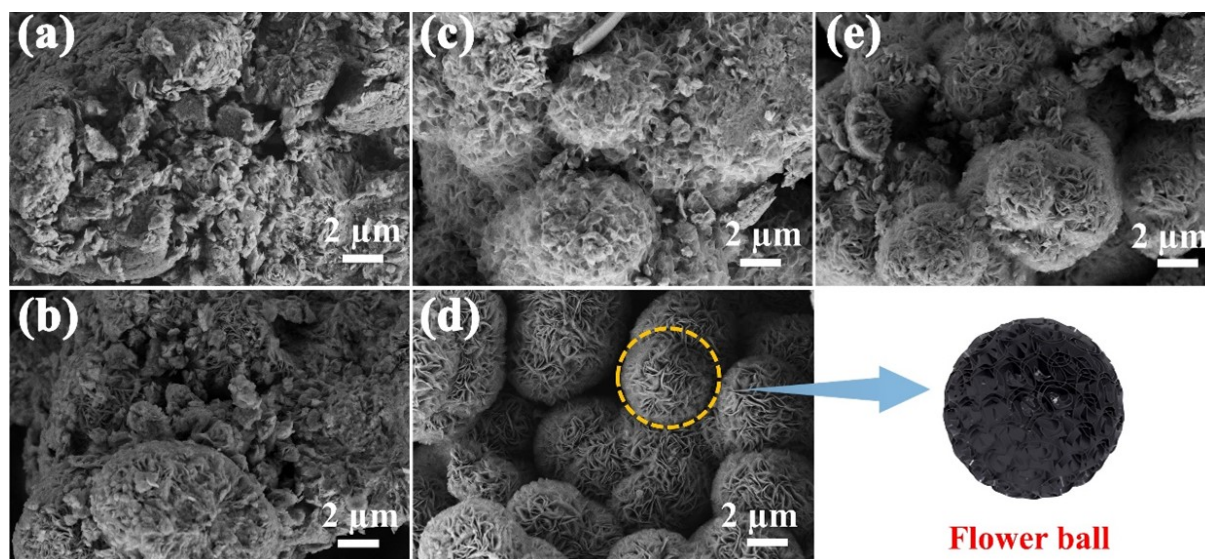

Fig. S1. SEM images of (a) P-NMS (b) NMSL-2, (c) NMSL-4, (d) NMSL-6, and (e) NMSL-8.

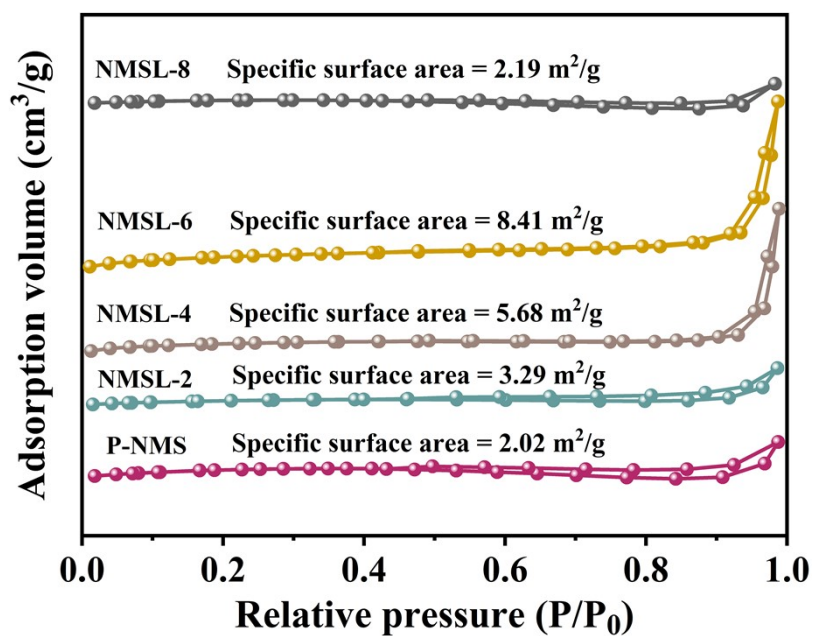

Fig. S2. N<sub>2</sub> adsorption-desorption isotherms

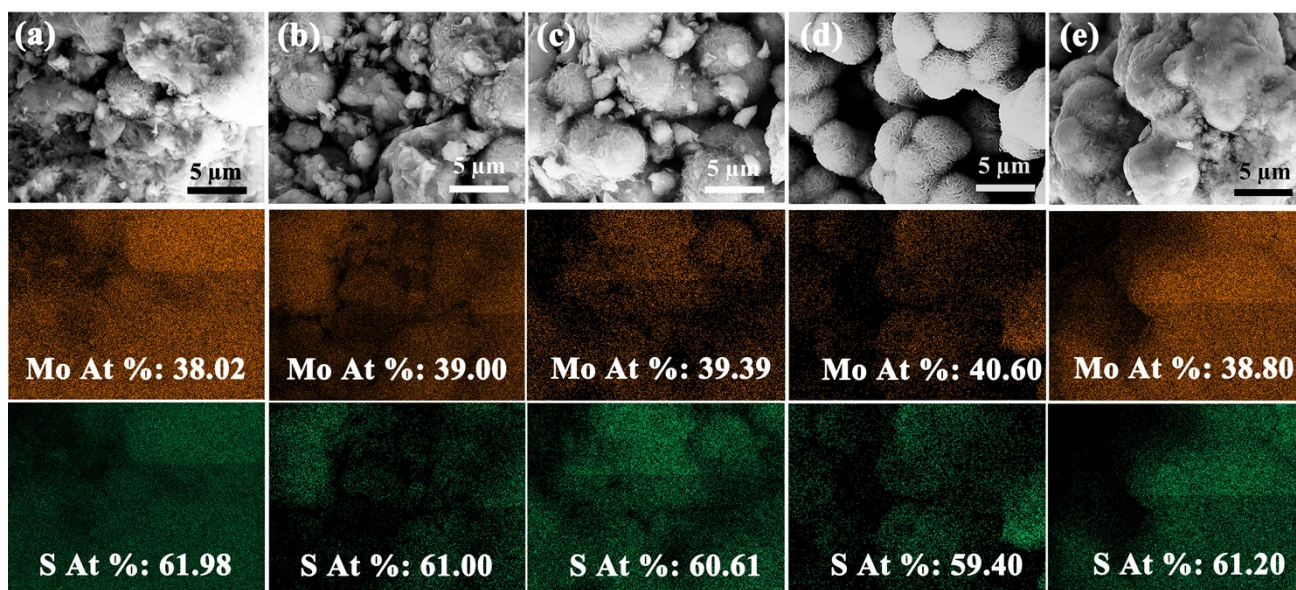

**Fig. S3.** EDS images of (a) P-NMS, (b) NMSL-2, (c) NMSL-4, (d) NMSL-6, and (e) NMSL-8 and element maps of S and Mo corresponding to this region

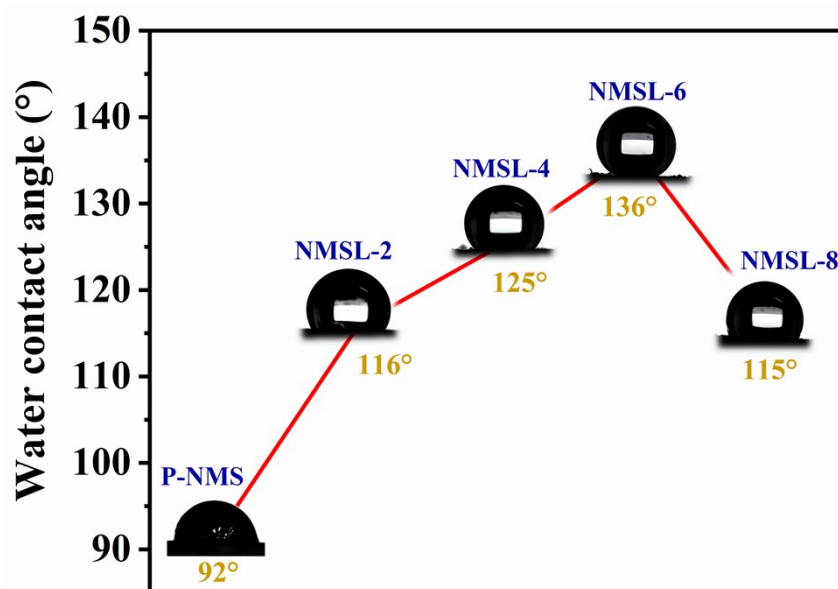

**Fig. S4.** Water contact angle of P-NMS and NMSL-X.

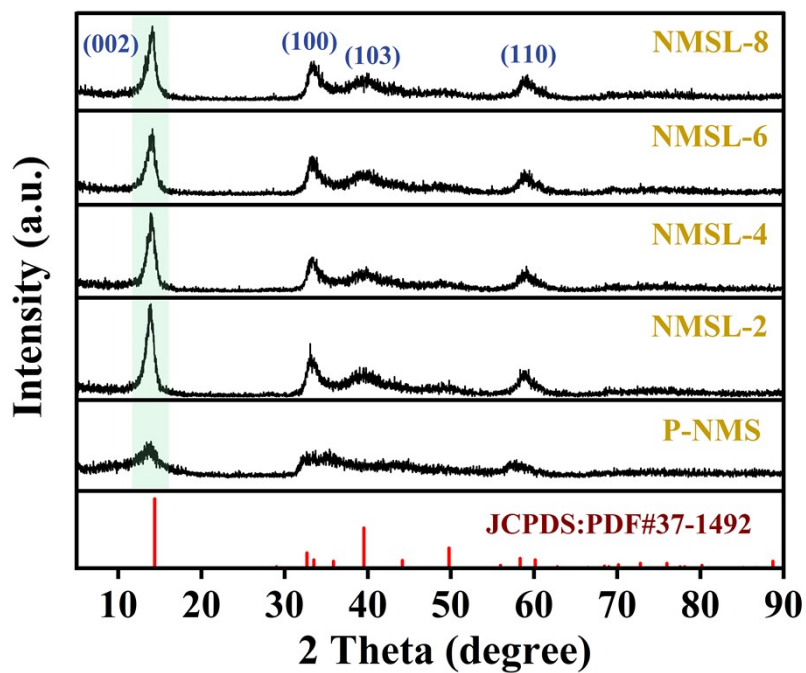

Fig. S5. XRD pattern of P-NMS and NMSL-X.

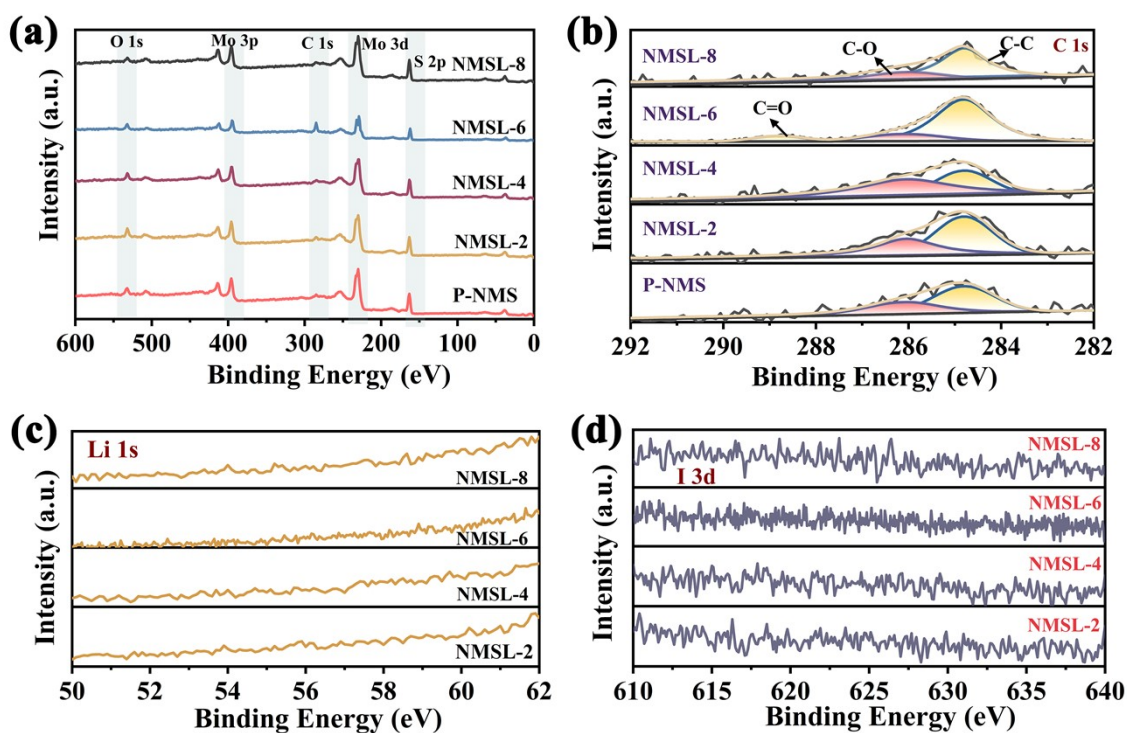

Fig. S6. XPS spectra of P-NMS and NMSL-X. (a) survey spectra, (b) C1s. (c) Li 1s. (d) I 3d.

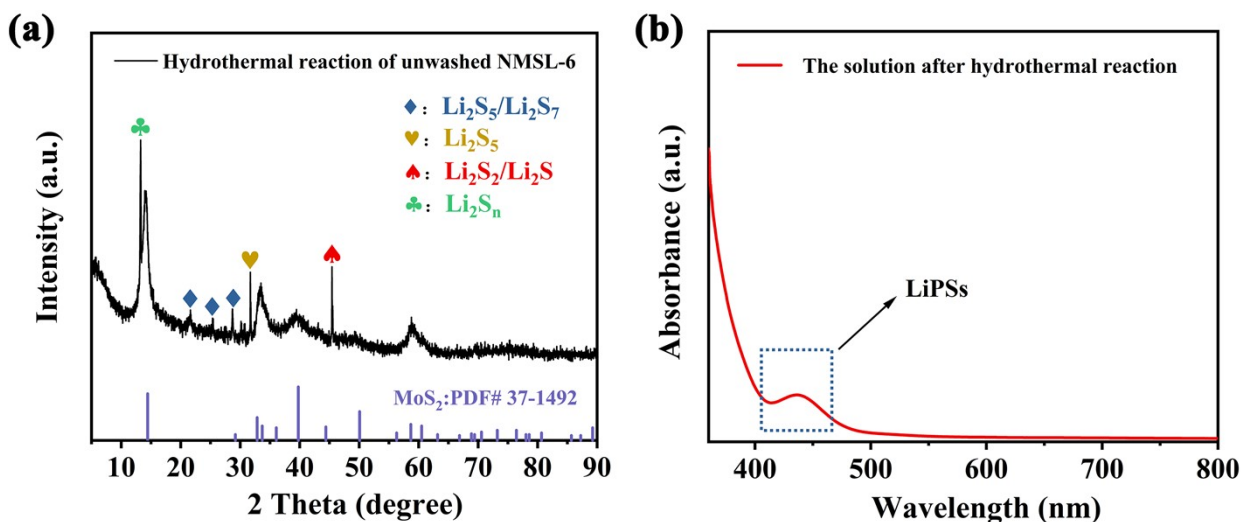

**Fig. S7.** (a) XRD pattern of unwashed NMSL-6 after hydrothermal reaction. (b) UV-Vis absorption spectrum of the solution after hydrothermal reaction.

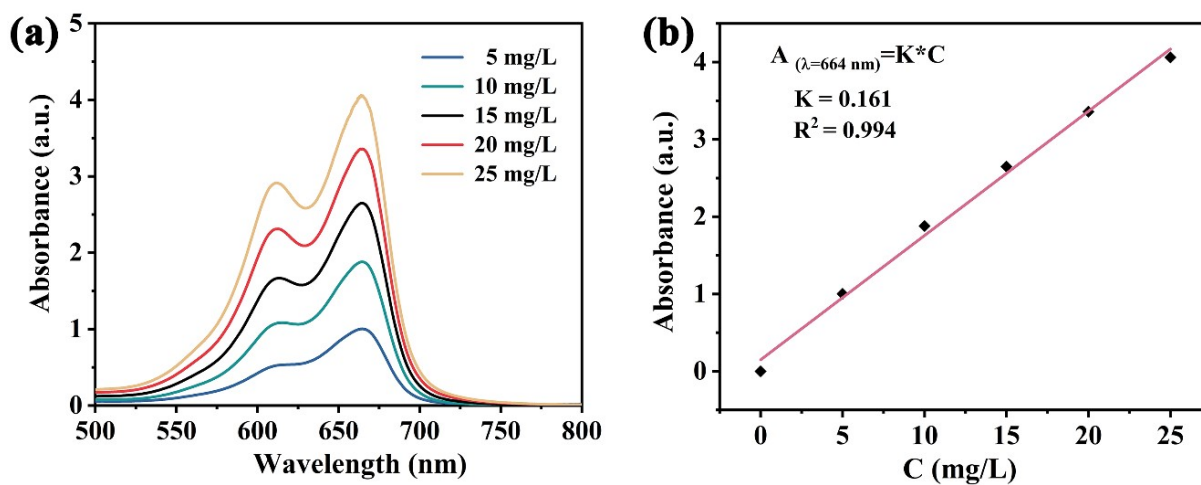

**Fig. S8.** (a) The absorbance of different concentrations of MB solution at  $\lambda=664$  nm; (b) standard curve of MB solution concentration versus absorbance



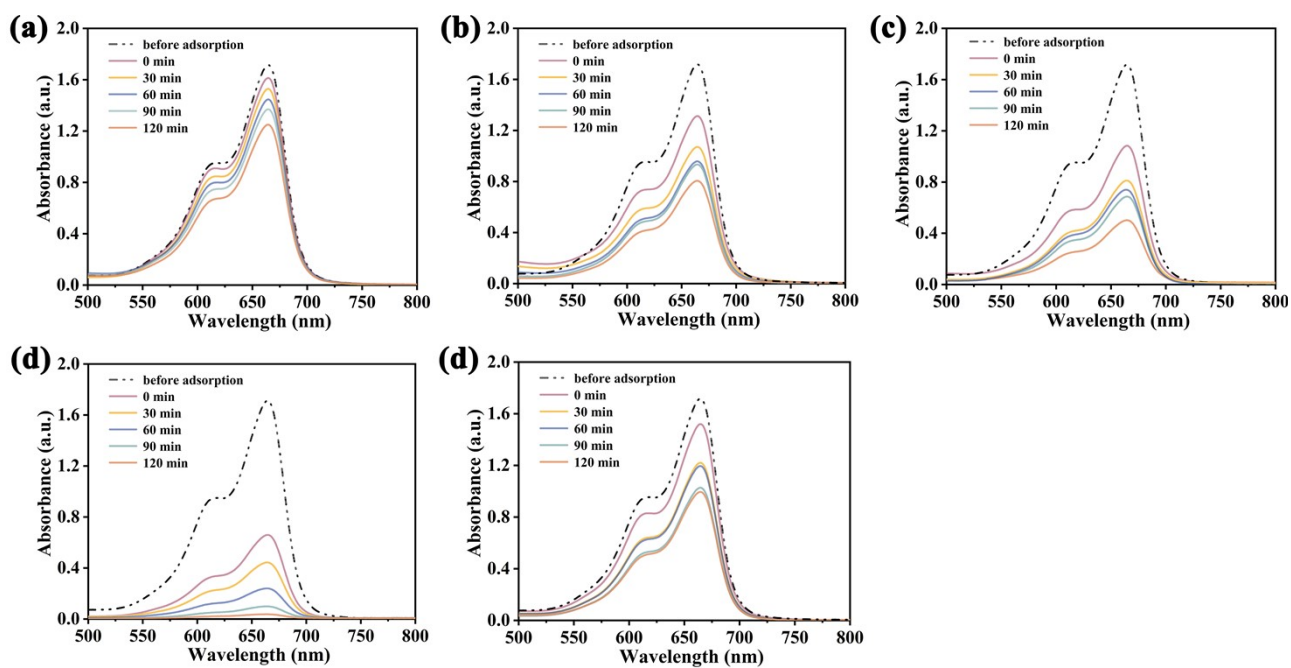

**Fig. S9.** UV-Vis absorption spectra of MB dye catalyzed by (a) P-NMS, (b) NMSL-2, (c) NMSL-4, (d) NMSL-6, and (e) NMSL-8.

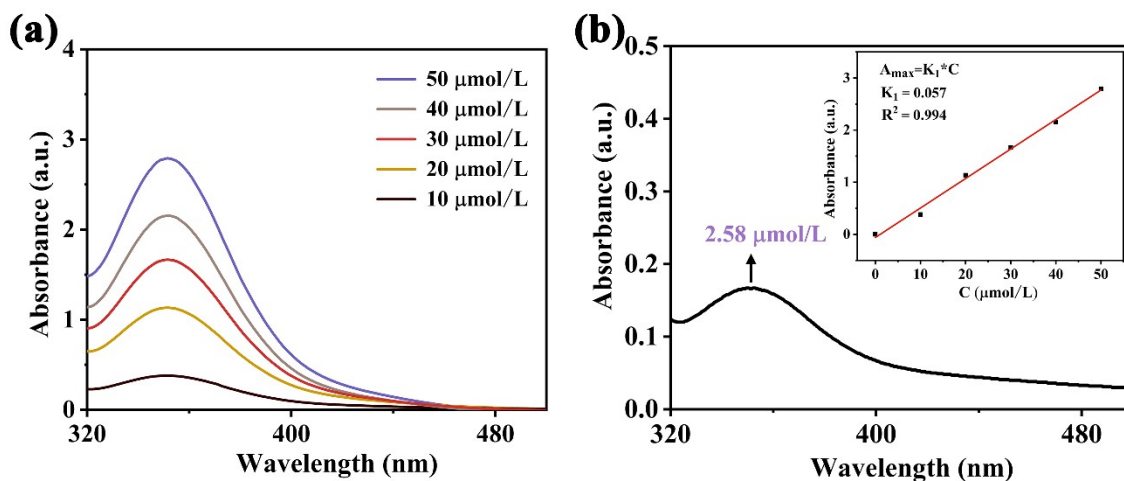

**Fig. S10.** (a) The UV-Vis absorption spectra of different concentrations of  $\text{H}_2\text{O}_2$  by iodometry. (b) The  $\text{H}_2\text{O}_2$  production of NMSL-6 in 2 hours determined by iodometry. The inset shows the calibration curve and fitting equation of  $\text{H}_2\text{O}_2$  concentration and absorbance.

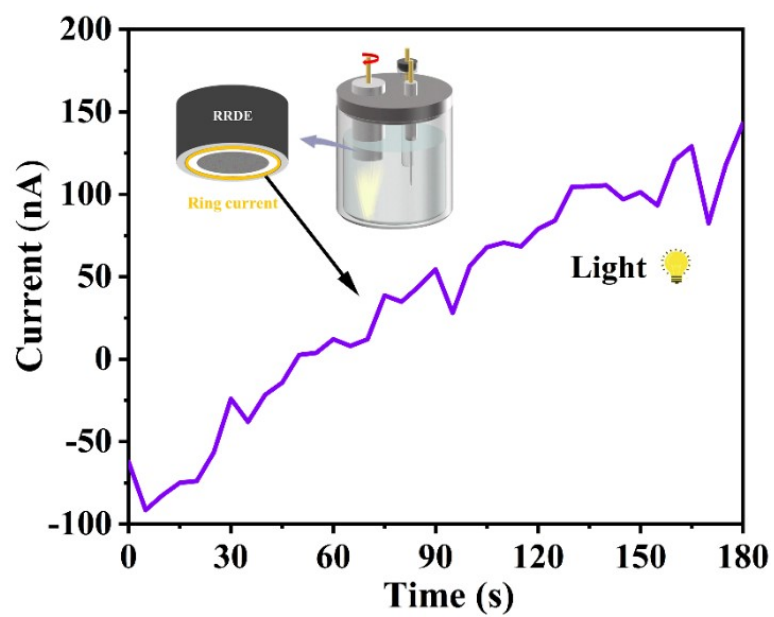

**Fig. S11.** The ring current time curves in the rotating ring-disk electrode (RRDE) of NMSL-4.

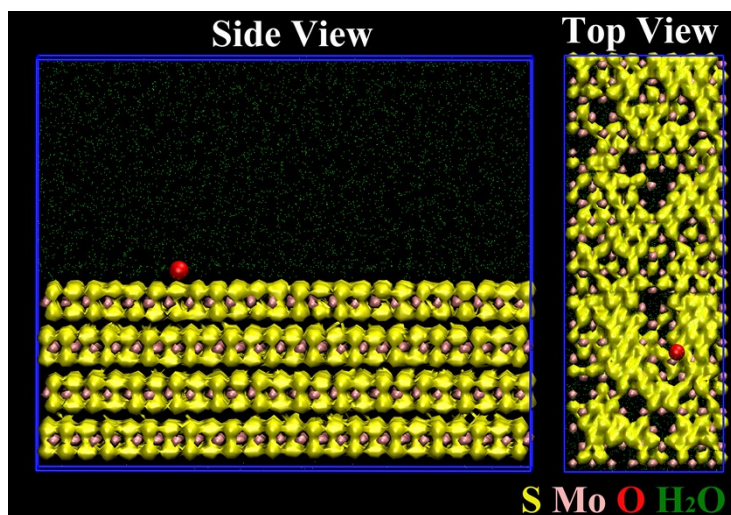

**Fig. S12.** Model of oxygen adsorption in water on the S point-defects of MoS<sub>2</sub> surface.

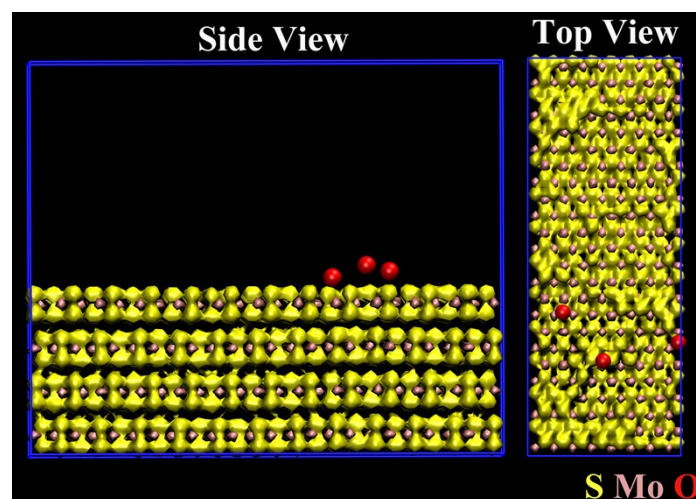

**Fig. S13.** Model of oxygen adsorption in vacuum on the S stripping-defects of MoS<sub>2</sub> surface.

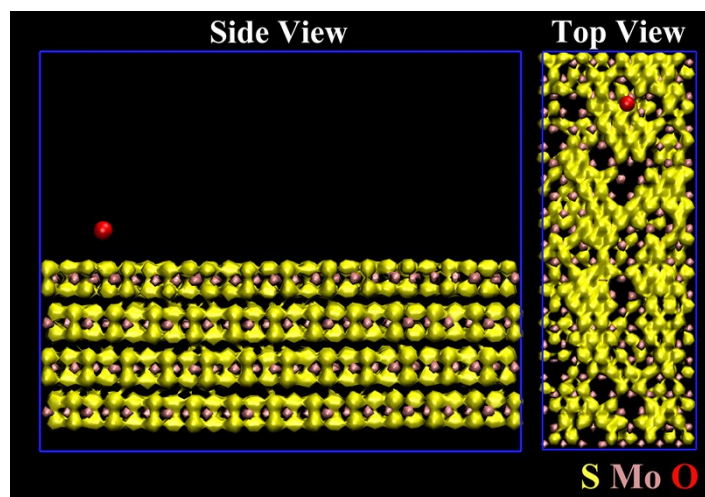

**Fig. S14.** Model of oxygen adsorption in vacuum on the S point-defects of MoS<sub>2</sub> surface.

#### S4. Supplementary Tables

**Tab S1.** Analyzed the content of Mo and S in samples from EDS.

| Sample        | S/Mo         |
|---------------|--------------|
| P-NMS         | 1.630        |
| NMSL-2        | 1.564        |
| NMSL-4        | 1.538        |
| <b>NMSL-6</b> | <b>1.463</b> |
| NMSL-8        | 1.577        |

**Tab S2.** Normalized atomic percentage as determined by XPS.

| Sample        | S At (%)     | Mo At (%)    | S/Mo        |
|---------------|--------------|--------------|-------------|
| P-NMS         | 45.17        | 24.41        | 1.85        |
| NMSL-2        | 38.83        | 21.45        | 1.81        |
| NMSL-4        | 40.42        | 22.97        | 1.76        |
| <b>NMSL-6</b> | <b>17.84</b> | <b>11.81</b> | <b>1.51</b> |
| NMSL-8        | 46.81        | 25.72        | 1.82        |

**Tab S3.** Activity of different MoS<sub>2</sub> series catalysts for MB removal.

| Sample                                            | activity<br>[mg g <sup>-1</sup> ] | Ref              |
|---------------------------------------------------|-----------------------------------|------------------|
| 3% Ag-MoS <sub>2</sub>                            | 7.7                               | [1]              |
| MoS <sub>2</sub> /g-C <sub>3</sub> N <sub>4</sub> | 16                                | [2]              |
| MoS <sub>2</sub> @ZnO                             | 23.18                             | [3]              |
| Mn-SnO <sub>2</sub> @MoS <sub>2</sub>             | 15.47                             | [4]              |
| MoS <sub>2</sub> / CdS                            | 10                                | [5]              |
| <b>NMSL-6</b>                                     | <b>26.4</b>                       | <b>This work</b> |

**Tab S4.** Lattice parameters of the constructed models

|                |                       |        |
|----------------|-----------------------|--------|
| Lattice (Å)    | a                     | 25.283 |
|                | b                     | 65.688 |
|                | c                     | 54.590 |
| Cell Angle (°) | $\alpha=\beta=\gamma$ | 90.000 |

## Supplementary References

1. A. Nazneen, M. I. Khan, M. A. Naeem, M. Atif, M. Iqbal, N. Yaqub and W. A. Farooq, Structural, morphological, optical, and photocatalytic properties of Ag-doped MoS<sub>2</sub> nanoparticles, *Journal of Molecular Structure*, 2020, **1220**, 128735.
2. P. Cao, N. Chen, W. Tang, Y. Liu, Y. Xia, Z. Wu, F. Li, Y. Liu and A. Sun, Template-assisted hydrothermal synthesized hydrophilic spherical 1T-MoS<sub>2</sub> with excellent zinc storage performance, *Journal of Alloys and Compounds*, 2022, **898**, 162854.
3. Y.-H. Tan, K. Yu, J.-Z. Li, H. Fu and Z.-Q. Zhu, MoS<sub>2</sub>@ZnO nano-heterojunctions with enhanced photocatalysis and field emission properties, *Journal of Applied Physics*, 2014, **116**.
4. S. Asaithambi, P. Sakthivel, M. Karuppaiah, K. Balamurugan, R. Yuvakkumar, M. Thambidurai and G. Ravi, Synthesis and characterization of various transition metals doped SnO<sub>2</sub>@MoS<sub>2</sub> composites for supercapacitor and photocatalytic applications, *Journal of Alloys and Compounds*, 2021, **853**, 157060.
5. S. A. Darsara, M. Seifi and M. B. Askari, One-step hydrothermal synthesis of MoS<sub>2</sub>/ CdS nanocomposite and study of structural, photocatalytic, and optical properties of this nanocomposite, *Optik*, 2018, **169**, 249-256.
